# Supplementary material for: Evaluating the role of post-harvest glyphosate application in enhancing weed control in winter wheat
Source: PeerJ. 2025 Mar 31;13:e19177. doi: 10.7717/peerj.19177 (PMC11967411; doi:10.7717/peerj.19177)
Supplement: Supplemental Information 1 [file peerj-13-19177-s001.xlsx]

## Sheet: herbicide_program_2020
treatment	replicate	yield (t/ha)		Treatment	Code
T1	1	5.245		Post-harvest glyphosate+post-em tribenuron	T1
T1	2	4.906		Post-harvest glyphosate+hand weeding	T5
T1	3	5.296		Post-harvest glyphosate+weedy check	T2
T1	4	4.93		No: PHG+Hand weeding	T6
T5	1	5.223		No PHG+Post-em tribenuron	T3
T5	2	5.305		No PHG+Weedy check	T4
T5	3	4.977
T5	4	5.295
T2	1	3.75
T2	2	3.955
T2	3	3.945
T2	4	3.91
T6	1	5.113
T6	2	4.843
T6	3	5.055
T6	4	5.245
T3	1	4.35
T3	2	4.175
T3	3	4.256
T3	4	4.244
T4	1	3.77
T4	2	3.955
T4	3	3.8
T4	4	3.625

## Sheet: herbicide_program_2021
treatment	replicate	yield (t/ha)		Treatment	Code
T1	1	6.236		Post-harvest glyphosate+post-em tribenuron	T1
T1	2	6.455		Post-harvest glyphosate+hand weeding	T5
T1	3	6.34		Post-harvest glyphosate+weedy check	T2
T1	4	6.125		No: PHG+Hand weeding	T6
T5	1	6.688		No PHG+Post-em tribenuron	T3
T5	2	6.59		No PHG+Weedy check	T4
T5	3	6.843
T5	4	6.552
T2	1	4.98
T2	2	5.115
T2	3	5.04
T2	4	4.856
T6	1	6.113
T6	2	6.335
T6	3	6.296
T6	4	6.4
T3	1	4.95
T3	2	4.875
T3	3	4.886
T3	4	5.244
T4	1	4.66
T4	2	4.755
T4	3	4.6
T4	4	4.825

## Sheet: herbicide_program_2022
treatment	replicate	yield (t/ha)		Treatment	Code				Seteria italicus L.
T1	1	7.263		Post-harvest glyphosate+post-em tribenuron	T1
T1	2	7.18		Post-harvest glyphosate+hand weeding	T5
T1	3	7.205		Post-harvest glyphosate+weedy check	T2
T1	4	7.3		No: PHG+Hand weeding	T6
T5	1	7.55		No PHG+Post-em tribenuron	T3
T5	2	7.494		No PHG+Weedy check	T4
T5	3	7.385
T5	4	7.586
T2	1	5.843
T2	2	5.686
T2	3	5.815
T2	4	5.74
T6	1	7.035
T6	2	7.111
T6	3	7.186
T6	4	7.2
T3	1	5.725
T3	2	5.643
T3	3	5.786
T3	4	5.695
T4	1	5.41
T4	2	5.325
T4	3	5.275
T4	4	5.342

## Sheet: CTWR_2021
Treatment	Replicate	Time	GDD	yield (t/ha)
PHG	1	10	559.9	4.982
PHG	2	10	559.9	5.045
PHG	3	10	559.9	5.126
PHG	1	20	630.1	5.21
PHG	2	20	630.1	4.872
PHG	3	20	630.1	5.142
PHG	1	30	745.2	4.958
PHG	2	30	745.2	4.783
PHG	3	30	745.2	4.872
PHG	1	40	894.0	4.651
PHG	2	40	894.0	4.8
PHG	3	40	894.0	4.775
PHG	1	50	1060.6	4.354
PHG	2	50	1060.6	4.563
PHG	3	50	1060.6	4.271
PHG	1	60	1204.8	4.077
PHG	2	60	1204.8	4.196
PHG	3	60	1204.8	4.011
PHG	1	70	1397.6	3.867
PHG	2	70	1397.6	3.67
PHG	3	70	1397.6	3.543
PHG	1	80	1579.7	3.712
PHG	2	80	1579.7	3.685
PHG	3	80	1579.7	3.442
PHG	1	90	1751.0	3.448
PHG	2	90	1751.0	3.521
PHG	3	90	1751.0	3.464
PHG	1	100	1960.3	3.371
PHG	2	100	1960.3	3.648
PHG	3	100	1960.3	3.746
PHG	1	110	2181.0	3.553
PHG	2	110	2181.0	3.611
PHG	3	110	2181.0	3.315
PHG	1	225	2479.0	3.465
PHG	2	225	2479.0	3.514
PHG	3	225	2479.0	3.544
No PHG	1	10	559.9	4.904
No PHG	2	10	559.9	5.282
No PHG	3	10	559.9	5.353
No PHG	1	20	630.1	5.115
No PHG	2	20	630.1	4.974
No PHG	3	20	630.1	4.903
No PHG	1	30	745.2	4.666
No PHG	2	30	745.2	4.805
No PHG	3	30	745.2	4.571
No PHG	1	40	894.0	4.331
No PHG	2	40	894.0	4.8
No PHG	3	40	894.0	4.775
No PHG	1	50	1060.6	4.711
No PHG	2	50	1060.6	4.125
No PHG	3	50	1060.6	4.513
No PHG	1	60	1204.8	3.663
No PHG	2	60	1204.8	3.857
No PHG	3	60	1204.8	3.909
No PHG	1	70	1397.6	3.777
No PHG	2	70	1397.6	3.555
No PHG	3	70	1397.6	3.144
No PHG	1	80	1579.7	3.664
No PHG	2	80	1579.7	3.5
No PHG	3	80	1579.7	3.472
No PHG	1	90	1751.0	3.325
No PHG	2	90	1751.0	3.406
No PHG	3	90	1751.0	3.52
No PHG	1	100	1960.3	3.531
No PHG	2	100	1960.3	3.334
No PHG	3	100	1960.3	3.696
No PHG	1	110	2181.0	3.422
No PHG	2	110	2181.0	3.206
No PHG	3	110	2181.0	3.528
No PHG	1	225	2479.0	3.366
No PHG	2	225	2479.0	3.411
No PHG	3	225	2479.0	3.555

## Sheet: CTWR_2022
Treatment	Replicate	Time	GDD	yield (t/ha)
PHG	1	10	647.6	6.203
PHG	2	10	647.6	6.058
PHG	3	10	647.6	6.404
PHG	1	20	702.2	5.992
PHG	2	20	702.2	6.138
PHG	3	20	702.2	6.216
PHG	1	30	787.9	5.786
PHG	2	30	787.9	6.013
PHG	3	30	787.9	5.8
PHG	1	40	961.1	5.53
PHG	2	40	961.1	5.771
PHG	3	40	961.1	5.705
PHG	1	50	1125.8	5.068
PHG	2	50	1125.8	5.216
PHG	3	50	1125.8	5.089
PHG	1	60	1305.5	4.788
PHG	2	60	1305.5	4.672
PHG	3	60	1305.5	4.885
PHG	1	70	1480.5	4.5
PHG	2	70	1480.5	4.636
PHG	3	70	1480.5	4.712
PHG	1	80	1664.5	4.833
PHG	2	80	1664.5	4.765
PHG	3	80	1664.5	4.54
PHG	1	90	1876.4	4.73
PHG	2	90	1876.4	4.494
PHG	3	90	1876.4	4.611
PHG	1	100	2100.2	4.196
PHG	2	100	2100.2	4.337
PHG	3	100	2100.2	4.276
PHG	1	110	2330.0	4.355
PHG	2	110	2330.0	4.474
PHG	3	110	2330.0	4.189
PHG	1	225	2593.0	4.285
PHG	2	225	2593.0	4.348
PHG	3	225	2593.0	4.475
No PHG	1	10	647.6	6.065
No PHG	2	10	647.6	6.335
No PHG	3	10	647.6	6.18
No PHG	1	20	702.2	5.885
No PHG	2	20	702.2	6.165
No PHG	3	20	702.2	6.018
No PHG	1	30	787.9	5.67
No PHG	2	30	787.9	5.516
No PHG	3	30	787.9	5.465
No PHG	1	40	961.1	5.1
No PHG	2	40	961.1	5.365
No PHG	3	40	961.1	5.387
No PHG	1	50	1125.8	5.144
No PHG	2	50	1125.8	4.71
No PHG	3	50	1125.8	5.055
No PHG	1	60	1305.5	4.563
No PHG	2	60	1305.5	4.711
No PHG	3	60	1305.5	4.325
No PHG	1	70	1480.5	4.685
No PHG	2	70	1480.5	4.21
No PHG	3	70	1480.5	4.557
No PHG	1	80	1664.5	4.37
No PHG	2	80	1664.5	4.615
No PHG	3	80	1664.5	4.52
No PHG	1	90	1876.4	4.68
No PHG	2	90	1876.4	4.6
No PHG	3	90	1876.4	4.713
No PHG	1	100	2100.2	4.3
No PHG	2	100	2100.2	4.415
No PHG	3	100	2100.2	4.51
No PHG	1	110	2330.0	4.55
No PHG	2	110	2330.0	4.498
No PHG	3	110	2330.0	4.631
No PHG	1	225	2593.0	4.204
No PHG	2	225	2593.0	4.415
No PHG	3	225	2593.0	4.62

## Sheet: CTWR_2023
Treatment	Replicate	Time	GDD	yield (t/ha)
PHG	1	10	662.40	6.94
PHG	2	10	662.40	7.035
PHG	3	10	662.40	7.3
PHG	1	20	758.30	6.89
PHG	2	20	758.30	7.045
PHG	3	20	758.30	7.1
PHG	1	30	851.10	6.695
PHG	2	30	851.10	6.71
PHG	3	30	851.10	6.83
PHG	1	40	955.60	6.475
PHG	2	40	955.60	6.61
PHG	3	40	955.60	6.57
PHG	1	50	1070.80	6.255
PHG	2	50	1070.80	6.415
PHG	3	50	1070.80	6.18
PHG	1	60	1210.40	5.9
PHG	2	60	1210.40	6.035
PHG	3	60	1210.40	5.875
PHG	1	70	1331.00	5.62
PHG	2	70	1331.00	5.455
PHG	3	70	1331.00	5.38
PHG	1	80	1465.60	5.125
PHG	2	80	1465.60	5.26
PHG	3	80	1465.60	5.295
PHG	1	90	1633.70	4.955
PHG	2	90	1633.70	5.145
PHG	3	90	1633.70	5.04
PHG	1	100	1827.50	4.5
PHG	2	100	1827.50	4.685
PHG	3	100	1827.50	4.315
PHG	1	110	2031.60	4.14
PHG	2	110	2031.60	4.095
PHG	3	110	2031.60	4.205
PHG	1	225	2518.38	4.1
PHG	2	225	2518.38	4.345
PHG	3	225	2518.38	4.035
No PHG	1	10	662.40	6.545
No PHG	2	10	662.40	6.815
No PHG	3	10	662.40	6.4
No PHG	1	20	758.30	6.05
No PHG	2	20	758.30	6.185
No PHG	3	20	758.30	6.275
No PHG	1	30	851.10	5.73
No PHG	2	30	851.10	6.015
No PHG	3	30	851.10	5.98
No PHG	1	40	955.60	5.53
No PHG	2	40	955.60	5.485
No PHG	3	40	955.60	5.26
No PHG	1	50	1070.80	4.875
No PHG	2	50	1070.80	4.765
No PHG	3	50	1070.80	5.02
No PHG	1	60	1210.40	4.31
No PHG	2	60	1210.40	4.475
No PHG	3	60	1210.40	4.38
No PHG	1	70	1331.00	4.505
No PHG	2	70	1331.00	4.29
No PHG	3	70	1331.00	4.345
No PHG	1	80	1465.60	4.42
No PHG	2	80	1465.60	4.16
No PHG	3	80	1465.60	4.215
No PHG	1	90	1633.70	4.285
No PHG	2	90	1633.70	4.4
No PHG	3	90	1633.70	4.255
No PHG	1	100	1827.50	3.95
No PHG	2	100	1827.50	4.13
No PHG	3	100	1827.50	4.205
No PHG	1	110	2031.60	3.86
No PHG	2	110	2031.60	3.765
No PHG	3	110	2031.60	3.885
No PHG	1	225	2518.38	3.7
No PHG	2	225	2518.38	3.655
No PHG	3	225	2518.38	3.915

## Sheet: WSB_2021
Treatment	Amaranthus retroflexus L.	Portulaca oleracea L.	Chenopodium album L.	Seteria viridis L.	Solanum nigrum L.	Xanthium strumarium L.	Poligonum aviculare L.	Seteria italicus L.	Lactuca serriola L.
No HGS+Post-em Tribenuron-methyl	4		11	2
	15	16	11		5
	43	4	10		2
	15		5	1
HGS+ Weedy check	5		6	1			1
	10	6	4		1
	7		5
	15		6	4	3
HGS+ Hand weeding	1		17
	15		17
	43	8	15
	9	2	12
No HGS+Post-em Tribenuron-methyl	42	14	9						1
	45	12	18		2
	16	3	9		3
	18	8	12	1
No HGS+ Weedy check	5		7					3
	8		4
	42	9	20	2	3
	15	4	6		1
No HGS+ Hand weeding	22		6
	14	6	9
	38	6	16	2	2	2
	42	9	20	2	3

## Sheet: WSB_2022
Treatment	Amaranthus retroflexus L.	Veronica hederifola L.	Portulaca oleracea L.	Chenopodium album L.	Seteria viridis L.	Solanum nigrum L.	Poligonum aviculare L.	Xanthium strumarium L.	Euphorbia spp.
No HGS+Post-em Tribenuron-methyl	18		8	15	12
	26			13		2
	45		4	25	3	2		1
	33		1	7	1	15
HGS+ Weedy check	36		1	6	1	3
	12		1	6	5	2		1
	30			8		1
	5			7	1
HGS+ Hand weeding	15		1	8	4				1
	5			4	8		2
	14			7		2
	10			39		2
No HGS+Post-em Tribenuron-methyl	75		8	24	1	7
	35	6	9	28		8
	49	4	14	29	3	9	1
	35	5	12	23		8	1
No HGS+ Weedy check	27		7	31	1	8	1
	35		8	29		4
	26		5	33
	42		9	25		7
No HGS+ Hand weeding	25		7	17	2	3
	38		6	40		7	4
	45		8	19	2	9
	62		9	26		9	2

## Sheet: WSB_2023
Treatment	Amaranthus retroflexus L.	Veronica hederifola L.	Portulaca oleracea L.	Chenopodium album L.	Seteria viridis L.	Solanum nigrum L.	Stellaria media (L.) Vill.	Poligonum aviculare L.	Consolida regalis Gray
No HGS+Post-em Tribenuron-methyl	23		3	7				1
	4			1
	12			5	3			1
	1			9
HGS+ Weedy check	45		7	21	4
	22		10	12	15
	26		3	17
	25			6	8	1
HGS+ Hand weeding	10		3	8	2	3
	11			13	1	1
	14			4	9	2
	44		1	14	5	5			1
No HGS+Post-em Tribenuron-methyl	24		11	19				4
	102	5	22	72	12	9		9	4
	25		7	17
	84		11	34	8			5
No HGS+ Weedy check	17		7	12
	92		7	43
	56		14	32	8	23	3
	31		9	15		6		8
No HGS+ Hand weeding	27		5	32		7		6
	44	7	4	52	4				6
	66		31	58	4	5		4
	104		18	78		6		5	4

## Sheet: Weed-flora (2021-2023)
Weed species	2021				2022				2023
	T1	T2	T3	T4	T1	T2	T3	T4	T1	T2	T3	T4
VERHE	7	11.5	15	12.5	2.5	9.5	12.3	8.5	1.3	10.3	15	14.3
XANST	2	0.5	2.5	1	3.5	2.5	3.5	2	1.5	0.5	3.5	3.8
CIRAR	-	2	1.5	5.5	-	3	0.3	3.3	-	3	0.5	2.8
CONAR	4	4.3	6.3	5.5	3	1.5	7.5	6	1.5	2.8	5	7.3
CHEAL	16	12	8	8.3	15.5	13.8	11.3	6.5	7.3	14	8.8	4.5
FUMOF	-	1.5	3	1	-	2.8	2	4	-	6.8	1.5	3.8
GALAP	-	3.5	1	-	-	2.8	-	2	-	7.5	-	3
SINAR	-	-	1.5	2.5	-	1.5	0.3	3	-	2.5	1.3	4.3
POLAV	-	-	-	-	-	1	-	2	-	2	-	3
POROL	-	-	-	-	-		1.5	2.3	-	-	1	3
LACSE	-	-	-	-	-	2.3	-	1	-	3.5	0.5	3
SOLNI	-	-	-	0.5	-	-	-	-	-	-	-	-
SETVI	1.5	0.5	-	3	-	1	1	3	-	3.8	0.8	1.5
AMARE	6.5	4	10.3	8	2.5	5	11.5	9	2.5	6.8	14.3	10.5
ALOMY	-	-	-	-	7.5	3	1.25	4.3	1.8	2.8	2	3
Total	37	39.8	49.1	47.8	34.5	49.7	52.5	56.9	15.9	66.3	54.2	67.8
Average Weed Density	6.2	4.4	5.5	4.8	5.8	3.8	4.8	4.1	2.7	5.1	4.5	4.8
VERHE: Veronica hederifola L.; XANST: Xanthium strumarium L.; CIRAR: Cirsium arvense (L.) Scop.; CONAR: Convolvulus arvensis L.; CHEAL: Chenopodium album L.; FUMOF: Fumaria officinalis L.; GALAP: Galium aparine L.; SINAR: Sinapis arvensis L.; POLAV: Polygonum aviculare L.; POROL: Portulaca oleracea L.; LACSE: Lactuca serriola L.; SOLNI: Solanum nigrum L.; SETVI: Seteria viridis L.; AMARE: Amarant…
